# Supplementary material
Source: Springer Nature journal article supplement (https://www.springermedizin.de/resource/supplementary/12914_2011_215_MOESM3_ESM.pdf/9537106)

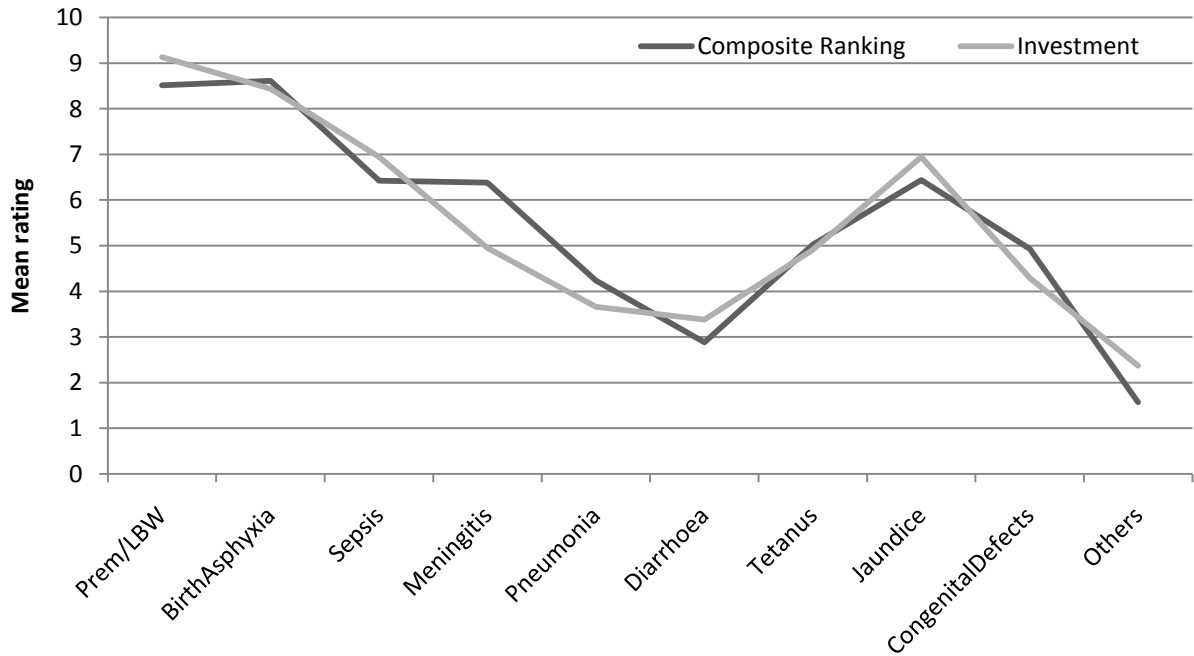

Supplement: MOESM3 [file 9537106]
